# Supplementary material for: Differential Effects of Iron Chelates vs. Iron Salts on Induction of Pro-Oncogenic Amphiregulin and Pro-Inflammatory COX-2 in Human Intestinal Adenocarcinoma Cell Lines
Source: MDPI journal article supplement (doi:10.3390/ijms24065507), 2023-03-14
Supplement: s1 [file s1]

## Supplementary Figure S1.

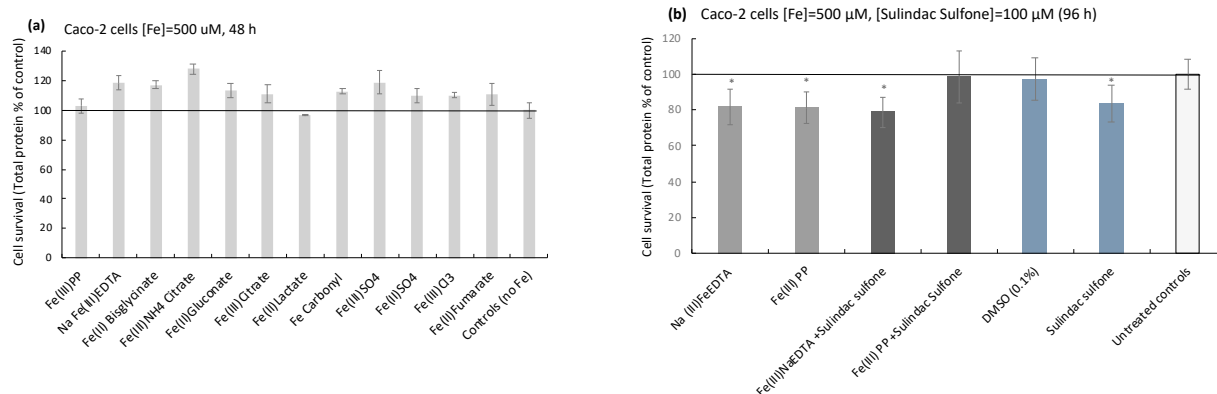

**Figure S1.** Cellular viability data (cell survival) for **a)** experiments with iron compounds at 500  $\mu$ M, 48 hours **b)** COX-2 inhibited cells (Sulindac sulfone at 100  $\mu$ M, 96 hours). Data are means of 3 cell replicates  $\pm$  Sdev. Significant differences from untreated control cells are indicated with an asterisk (\*).
